# Supplementary material
Source: PubMed Central journal article supplement (PMC1761969)
Supplement: plntphys_pp.106.090431_1.pdf [file plntphys_pp.106.090431_1.pdf]

## Supplemental Figures

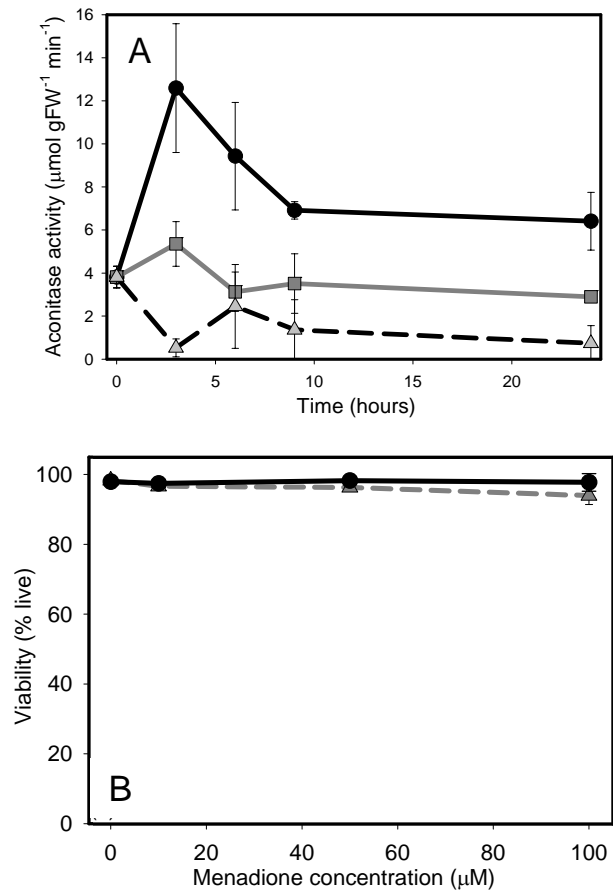

Supplemental figure 1. Optimisation and characterisation of Arabidopsis cell suspension culture stress treatments. Oxidative stress was imposed by the addition of in the form of 60  $\mu\text{M}$  (—■—) or 125  $\mu\text{M}$  (—△—) menadione resulted and is compared to control cells (—●—). A, aconitase activity over a 24 h timecourse. B, cell viability 24h after treatment

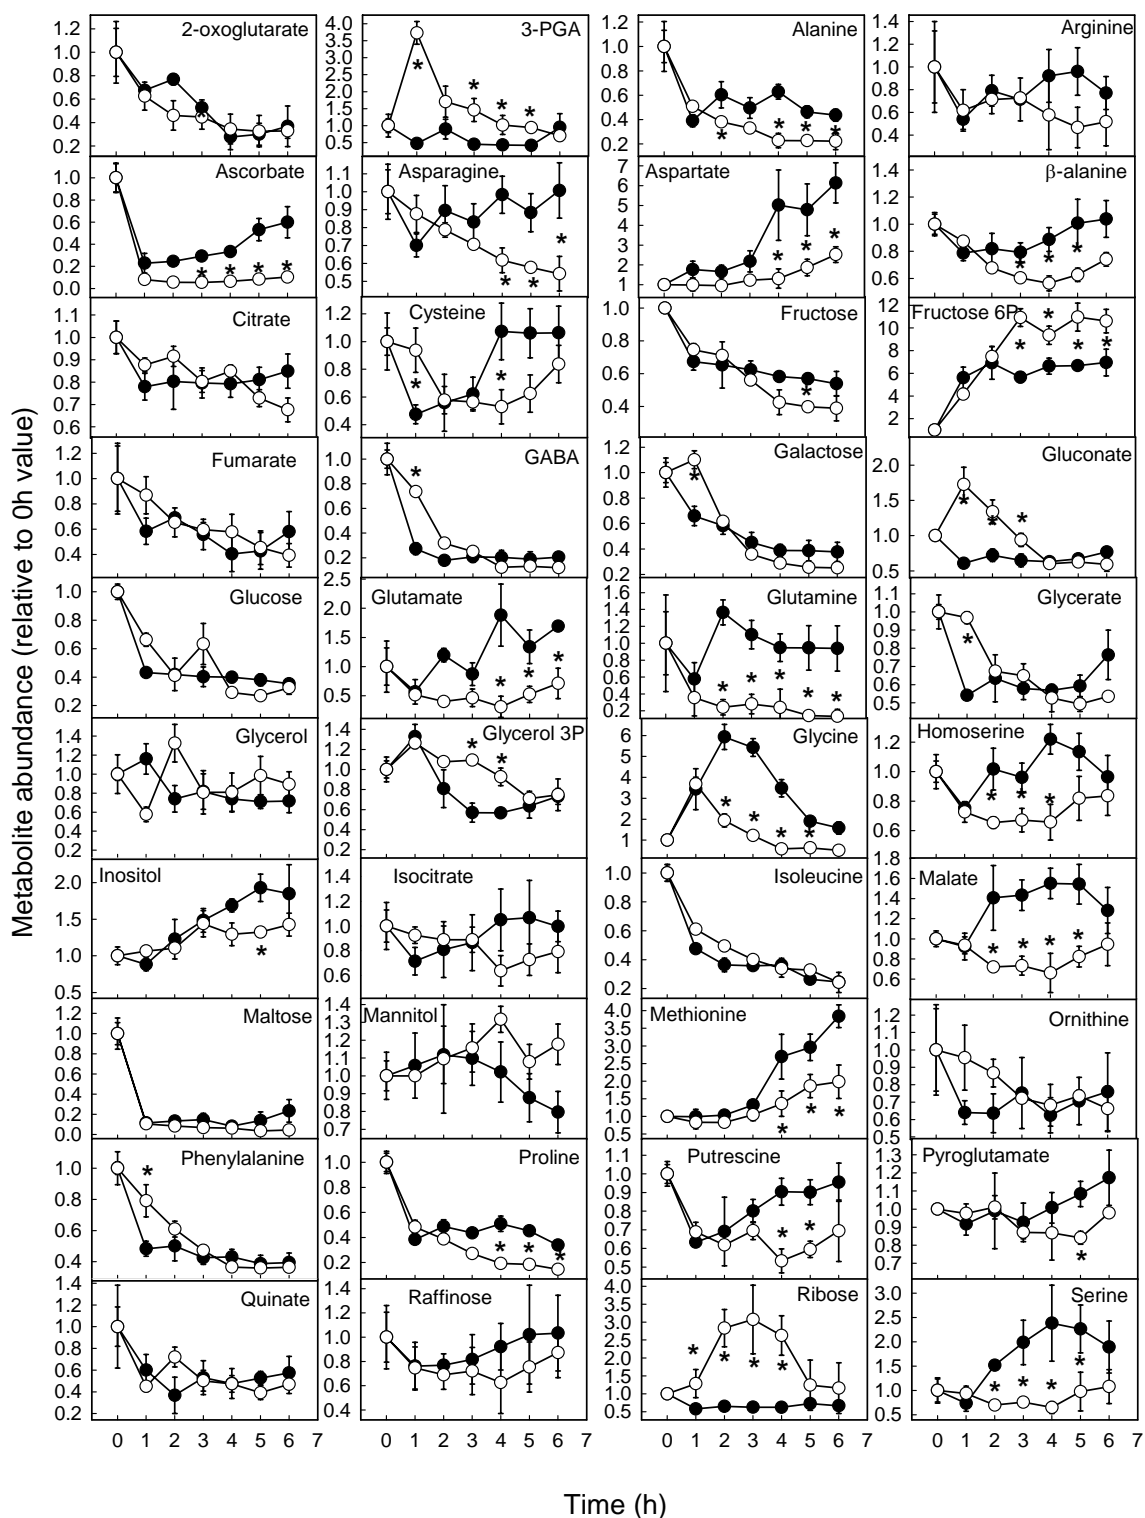

**Supplemental Figure 2.** Time series of metabolite abundances following oxidative stress treatment. Closed symbols, untreated (control); open symbols, menadione treated (oxidative stress). All values are the mean of 4 independent replicates  $\pm$  s.e.m. \* indicates significantly different from control (*t*-test,  $P < 0.05$ ).

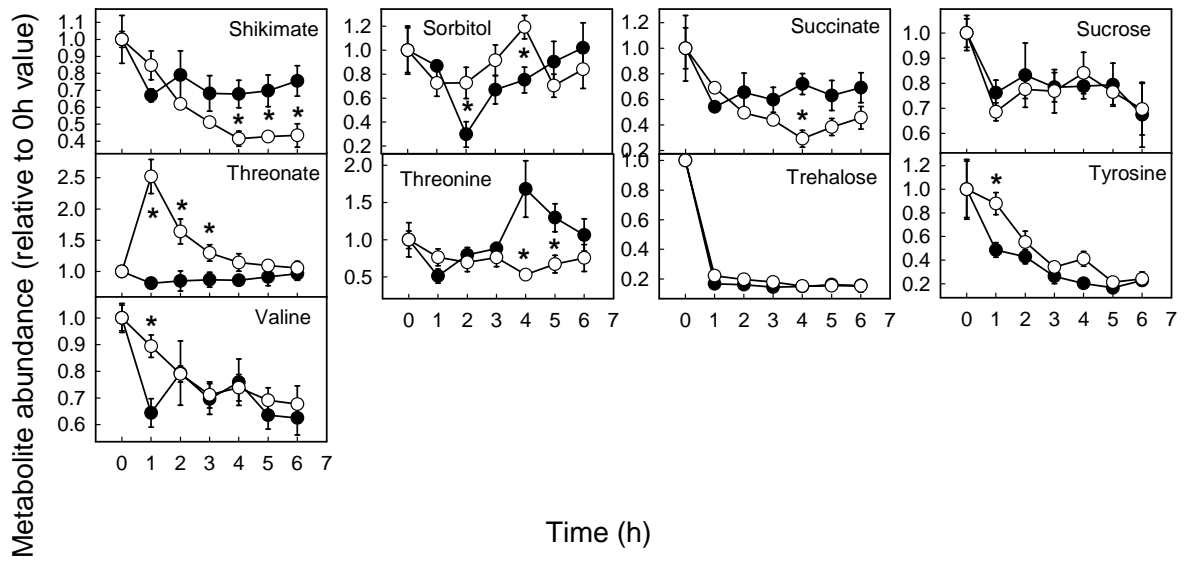

Supplemental Figure 2 (continued).

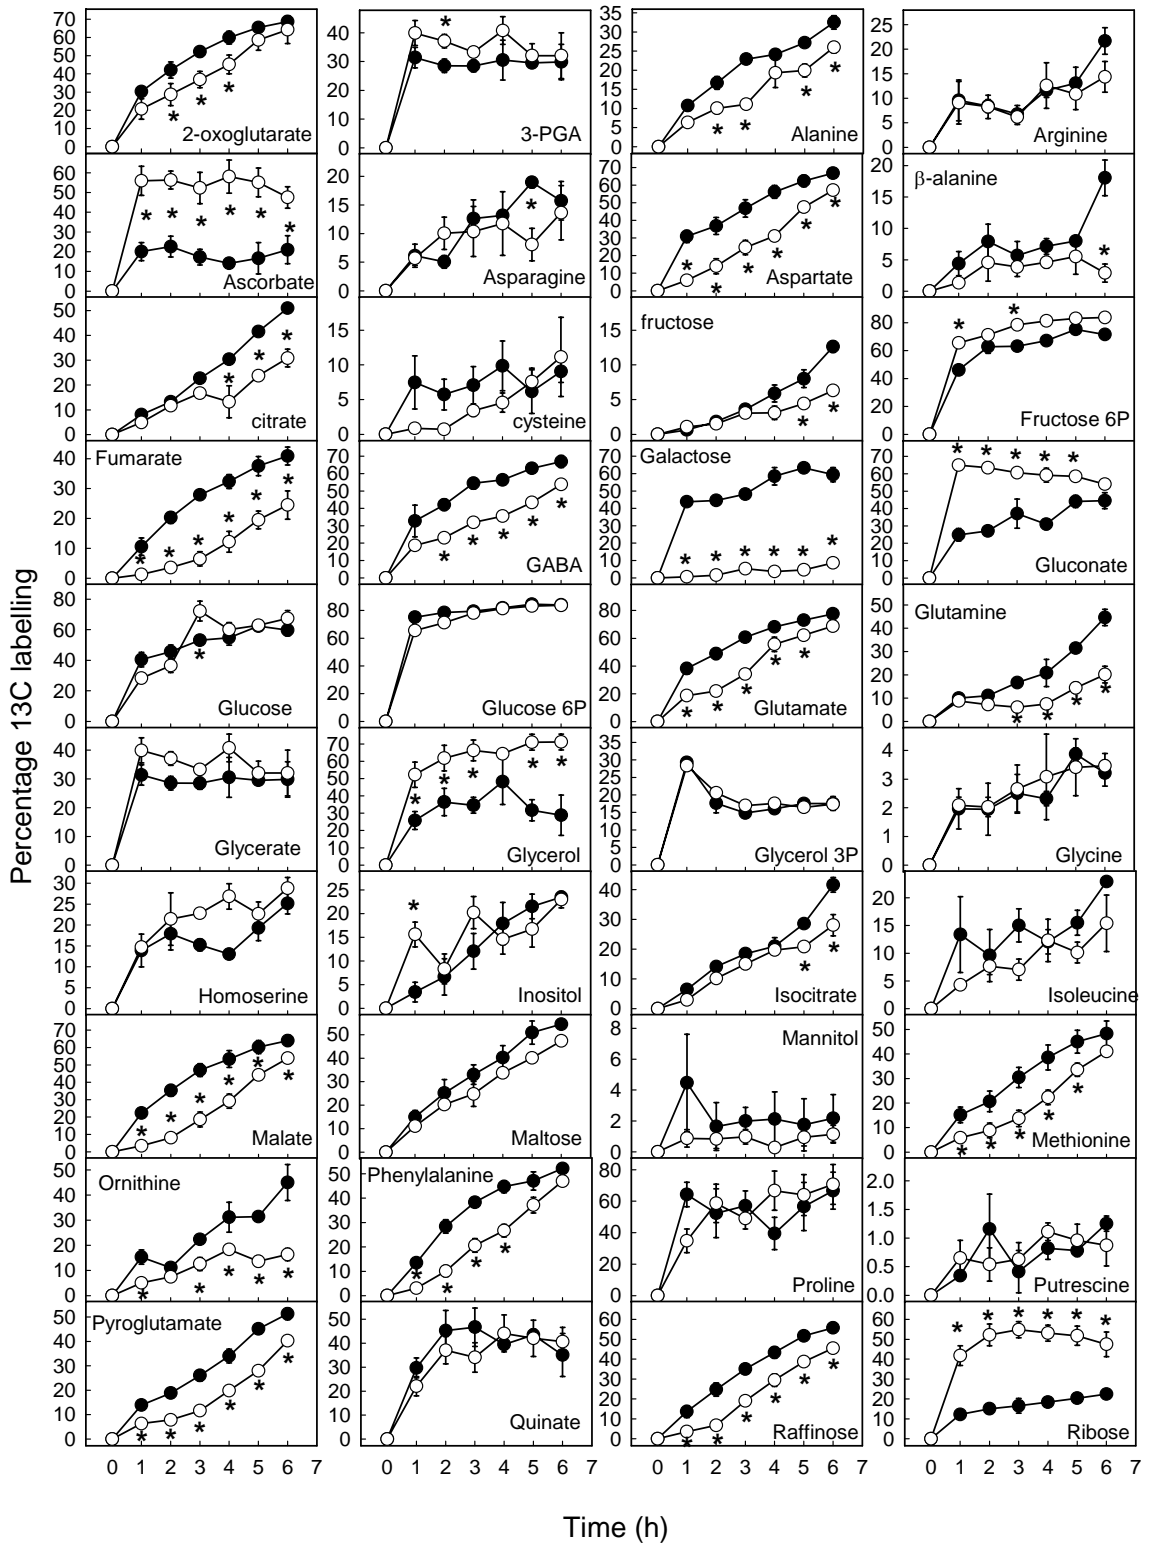

**Supplemental Figure 3.** Time series of <sup>13</sup>C labelling of metabolites in cells incubated with [U-<sup>13</sup>C]glucose. Closed symbols, untreated (control); open symbols, menadione treated (oxidative stress). All values are the mean of 4 independent replicates ± s.e.m. \* indicates significantly different from control (*t*-test, *P*<0.05).

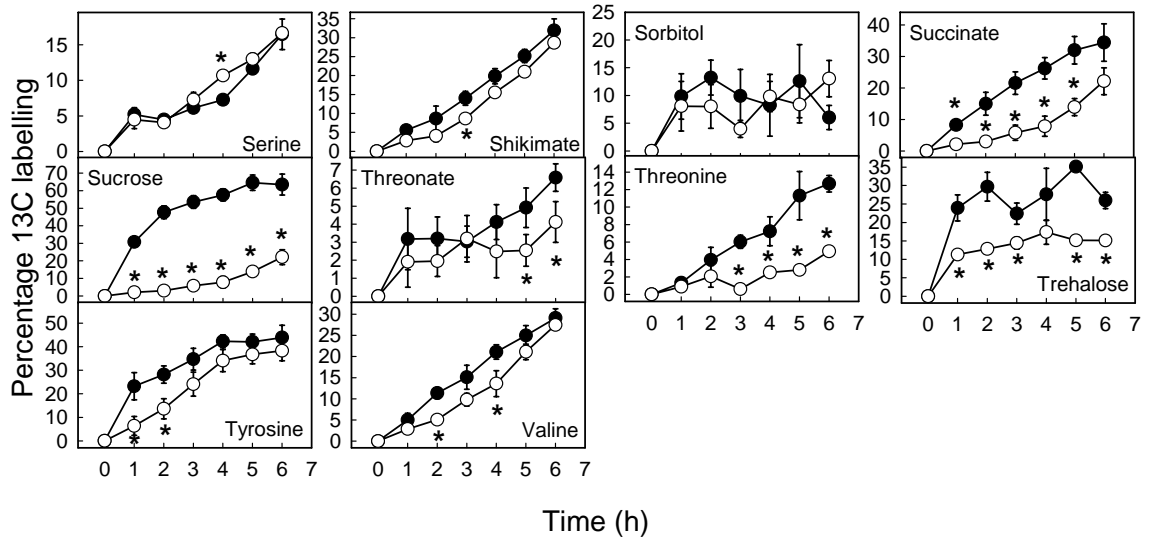

Supplemental Figure 3 (continued)
